# Supplementary material
Source: HighWire-hosted journal article supplement (https://cmaj.ca/highwire/filestream/57577/field_highwire_adjunct_files/0/pg213-f.pdf)
Supplement: pg213-f.pdf [file pg213-f.pdf]

# Utilisation des ceintures lombaires pour prévenir la lombalgie professionnelle

## Recommandations officielles du Groupe d'étude canadien sur les soins de santé préventifs

### Recommandation

- Le Groupe d'étude canadien sur les soins de santé préventifs conclut que les données probantes actuelles sont contradictoires et qu'il ne peut pas formuler de recommandations pour ou contre l'utilisation des ceintures lombaires pour prévenir la lombalgie professionnelle ou pour réduire le temps de travail perdu à cause de la lombalgie professionnelle (recommandation de catégorie C).

Au Canada, les blessures au dos sont à l'origine de plus de 25 % de toutes les réclamations pour temps perdu : il s'agit de la catégorie de réclamations la plus importante pour la plupart des commissions des accidents du travail des provinces et des territoires<sup>1</sup>. On estime que la lombalgie, qui fait souvent l'objet de soins primaires dans un premier temps, est le problème le plus coûteux chez les adultes en âge de travailler<sup>2</sup>. L'incapacité découlant de la lombalgie, qui est le problème de santé chronique le plus courant chez les adultes de moins de 45 ans, vient au deuxième rang derrière l'arthrite chez les adultes de 45 à 65 ans<sup>3</sup>. Au nombre des 90 % et plus des travailleurs qui retournent au travail six mois après le traumatisme, 20 % à 44 % subiront d'autres blessures à cause desquelles ils s'absenteront de nouveau et 15 % à 20 % des patients continueront d'éprouver des douleurs dorsales pendant au moins un an suite à l'apparition initiale<sup>4</sup>.

Les facteurs de risque éventuel de la lombalgie professionnelle s'inscrivent dans trois catégories principales : individuels, ergonomiques et psychosociaux<sup>5</sup>. Le facteur de risque le plus puissant est l'antécédent de lombalgie. En outre, plus un épisode de lombalgie était grave, plus le risque est grand qu'un autre épisode se produise<sup>2</sup>. On a établi des liens plus faibles avec l'âge, l'obésité et le sexe<sup>2</sup>. Rien n'indique que la force, la souplesse ou la capacité aéro-bique constituent des facteurs de risque ou de protection importants en ce qui concerne la lombalgie<sup>6</sup>. Au nombre des facteurs de risque ergonomiques, les liens les plus uniformes ont été établis avec le levage ou le port de lourdes charges, la vibration de l'ensemble du corps et les torsions et courbures fréquentes<sup>2,7,8</sup>. Enfin, il existe de plus en plus de données empiriques établissant un lien entre les facteurs de stress psychosociaux, comme la lourdeur perçue de la charge de travail, les contraintes de temps, le manque de liberté sur le plan intellectuel et l'insatisfaction à l'égard de l'emploi, et un risque accru de lombalgie professionnelle<sup>6,7,9</sup>.

### Preuves et sommaire clinique

- Trois des cinq études contrôlées et randomisées examinées ne révélaient pas de résultats positifs découlant de l'utilisation d'une ceinture lombaire<sup>10-12</sup>. La quatrième étude<sup>13</sup> a montré qu'il y a une réduction du temps perdu par les travailleurs suite à une formation en levage de fardeaux et au port d'une ceinture lombaire, mais peut-être seulement chez ceux qui ont des antécédents de lombalgie. La dernière étude<sup>14</sup> a révélé un taux de blessures au dos légèrement moindre chez les employés qui portaient une ceinture lombaire, par rapport au groupe témoin.
- Les personnes ayant des antécédents de lombalgie pourraient retirer des avantages de l'utilisation d'une ceinture lombaire. Néanmoins, avant que l'utilisation d'une ceinture lombaire ne soit prescrite, il faut établir le risque cardiovasculaire des patients et leur donner une formation sur les techniques de levage<sup>15</sup>.
- Même si certaines données de laboratoire indiquent que l'utilisation à long terme pourrait s'accompagner d'effets indésirables, ces risques n'ont pas été démontrés. En revanche, compte tenu de la combinaison d'avantages discutables et de risques d'effets négatifs, il faut prescrire l'utilisation des ceintures lombaires à court terme seulement<sup>15</sup>.
- Les études examinées ont fait appel à divers modèles de ceintures lombaires. Étant donné qu'aucun des modèles n'a entraîné de résultat bénéfique, il est peu probable que les différences à ce chapitre aient joué sur les résultats.
- Dans le contexte des données de laboratoire contradictoires quant aux façons dont les ceintures lombaires pourraient prévenir la lombalgie, il n'est pas surprenant de constater que les études examinées ne présentent pas des conclusions uniformes<sup>16-18</sup>. La controverse que soulève l'utilisation des ceintures lombaires s'étend au domaine du traitement, au sujet duquel les résultats découlant des études contrôlées et randomisées sont contradictoires également.
- Il faudrait effectuer d'autres études contrôlées et randomisées bien conçues afin de déterminer l'efficacité des ceintures lombaires pour prévenir la lombalgie dans les groupes à risque élevé, en particulier les personnes ayant des antécédents de lombalgie. Cette constatation rejoint celle présentée dans un récent examen de Cochrane<sup>19</sup>.

## Intervention

- Utilisation de supports dorsaux mécaniques (p. ex., ceintures ou corsets).

## Avantages potentiels

- Réduction du risque d'apparition ou de réapparition de la lombalgie.
- Réduction du temps de travail perdu à cause de la lombalgie.

## Préjudices potentiels

- Frottement cutané, pincement ou contusion au niveau des côtes; position assise et conduite entravées; sudation excessive.
- Faux sentiment de sécurité.
- Les examens de laboratoire indiquent une augmentation de la pression artérielle et intra-abdominale, une diminution de la force musculaire du dos et des hernies abdominales.

## Recommandations d'autres instances

Le Centre canadien d'hygiène et de sécurité au travail<sup>20</sup> et le National Institute for Occupational Safety and Health des États-Unis<sup>16,21</sup> n'appuient pas l'utilisation des ceintures lombaires comme mesure de prévention. En revanche, le récent règlement en ergonomie de la Occupational Safety and Health Administration des États-Unis<sup>22</sup>, dans lequel les supports dorsaux sont classés comme équipement de protection individuelle, indique qu'ils pourraient permettre d'éviter des blessures au dos dans certains milieux industriels.

Cet article a fait l'objet d'un examen par les pairs.

Le Groupe d'étude canadien sur les soins de santé préventifs est un comité indépendant subventionné par un partenariat établi entre le gouvernement fédéral et les gouvernements des provinces et des territoires du Canada.

Cette position s'appuie sur le rapport technique : «The use of back belts for prevention of occupational low back pain: systematic review and recommendations», par C. Ammendolia, M.S. Kerr, C. Bombardier, en collaboration avec le Groupe d'étude canadien sur les soins de santé préventifs. Rapport technique du GECSSP n° 02-1. London (Ont.) : Groupe d'étude canadien; 2002. [Pour obtenir le rapport technique intégral, veuillez communiquer avec le Groupe d'étude à l'adresse [ctf@ctfphc.org](mailto:ctf@ctfphc.org)]

Intérêts concurrents : Aucun déclaré.

## Références

1. Association des commissions des accidents du travail du Canada. *Programme national de statistiques sur les accidents du travail*. Mississauga (Ont.) : L'Association; 1999.
2. Frank JW, Kerr MS, Brooker A, DeMaio S, Maetzel A, Shannon HS, et al. Disability resulting from occupational low back pain. Part I: What do we know about primary prevention? A review of the scientific evidence on prevention before disability begins. *Spine* 1996;21:2908-17.
3. Bigos SJ, Bowyer OR, Braen GR, Brown K, Deyo R. *Acute low back problems in adults: clinical practice guidelines 14*. Rockville (MD) : Agency for Health Care Policy and Research, Public Health Service, US Department of Health and Health Services; 1994. Publication numéro 95-0642.
4. Rossignol M, Suissa S, Abenhaim L. Working disability due to occupational back pain: three-year follow-up of 2,300 compensated workers in Quebec. *J Occup Med* 1988;30:502-5.
5. Institute of Medicine. *Musculoskeletal disorders and the workplace: low back and upper extremities*. Washington : National Academy Press; 2001.
6. Nachemson A, Vingard E. *Influences of individual factors and smoking on neck and low back pain*. Dans : Nachemson A, Jonsson E, sous la direction de. Neck and back pain: the scientific evidence of causes, diagnosis and treatment. Philadelphie : Lippincott, Williams & Wilkins; 2000. p. 79-95.
7. Bernard BP, sous la direction de. *Musculoskeletal disorders and workplace factors. A critical review of epidemiological evidence for work-related musculoskeletal disorders of the neck, upper extremity, and low back*. Cincinnati : US Department of Health and Human Service, National Institute for Occupational Safety and Health; 1997.
8. Kerr MS, Frank JW, Shannon HS, Norman RW, Wells RP, Neumann WP, Bombardier C. Biomechanical and psychosocial risk factors for low back pain at work. *Am J Public Health* 2001;91:1069-75.
9. Hoogendoorn WE, van Poppel MNM, Bongers PM, Koes BW, Bouter LM. Systematic review of psychosocial factors at work and private life as risk factors for back pain. *Spine* 2000;25:2114-25.
10. Reddell CR, Congleton JJ, Huchingson RD, Montgomery JF. An evaluation of a weightlifting belt and back injury prevention training class for airline baggage handlers. *Appl Ergon* 1992;23:319-29.
11. Van Poppel MN, Koes BW, van der Ploeg T, Smid T, Bouter LM. Lumbar supports and education for the prevention of low back pain in industry: a randomized controlled trial. *JAMA* 1998;279:1789-94.
12. Alexander A, Woolley SM, Bisesi M, Schaub E. The effectiveness of back belts on occupational back injuries and worker perception. *Prof Saf* 1995; 40(9):22-6.
13. Walsh NE, Schwartz RK. The influence of prophylactic orthoses on abdominal strength and low back injury in the workplace. *Am J Phys Med Rehabil* 1990;69:245-50.
14. Kraus JF, Schaffer KB, Rice T, Maroosis J, Harper J. A field study of back belts to reduce the incidence of acute low back injuries in New York City home attendants. *Int J Occup Environ Health* 2002;8:97-104.
15. McGill S. Update on the use of back belts in industry: more data, same conclusions. Dans : Karwowski W, Marras W, sous la direction de. *Occupational ergonomics handbook*. Boca Raton (FL) : CRC Press; 1999. p. 1353-8.
16. National Institute for Occupational Safety and Health. *Workplace use of back belts*. Centers for Disease Control and Prevention. Washington : US Department of Health and Human Services; 1994. Publication numéro 94-122.
17. Woodhouse ML, McCoy RW, Redondo DR, Shall LM. Effects of back support on intra-abdominal pressure and lumbar kinetics during heavy lifting. *Hum Factors* 1995;37:582-90.
18. Van Poppel MNM, de Looze MP, Koes BW, Smid T, Bouter LM. Mechanisms of action of lumbar supports: a systematic review. *Spine* 2000;25:2103-13.
19. Jellema P, van Tulder MW, van Poppel MN, Nachemson AL, Bouter LM. Lumbar supports for prevention and treatment of low back pain: a systematic review within the framework of the Cochrane Back Review Group. *Spine* 2001;26:377-86.
20. Centre canadien d'hygiène et de sécurité au travail. *Back belts*. Document 0365L.wpf. 250. Hamilton (Ont.) : Le Centre; 11 août 1995.
21. Wassell JT, Gardner LI, Landsittel DP, Johnston JJ, Johnston JM. A prospective study of back belts for prevention of back pain and injury. *JAMA* 2000;284:2727-32.
22. Occupational Safety and Health Administration. *Ergonomic program: final rule*. Dans : Federal Register 2000;65(220):68261-870. Washington. Disponible : [http://www.nacubo.org/public\\_policy/federal\\_register\\_update/2000/112200.html](http://www.nacubo.org/public_policy/federal_register_update/2000/112200.html) (consulté le 26 juin 2003).

**Correspondance** : Groupe d'étude canadien sur les soins de santé préventifs, 117-100 Collip Circle, London (Ont.) N6G 4X8; téléc. : (519) 858-5112; [ctf@ctfphc.org](mailto:ctf@ctfphc.org)
